# Supplementary material
Source: publisher site journal article supplement (https://www.dovepress.com/article/222881)

**Caption of Figure S1**

**Figure S1** Cyclin A expression in normal, vector, WT-SHP2, and MT-SHP2 A172 and U87 cells. (**A** and **B**) Western blotting analysis was used to measure the expression of SHP2 following transduction with LV-NC, LV-SHP2, and LV-E76K MT-SHP2 in A172 and U87 cells. β-actin was used to ensure equal loading. The data are presented as the means ± SEM (***P<0.001).

**Abbreviations:** SHP2, Src homology-2 domain-containing protein-tyrosine phosphatase-2; WT, wild type; MT, mutant; LV, lentivirus; NC, negative control.


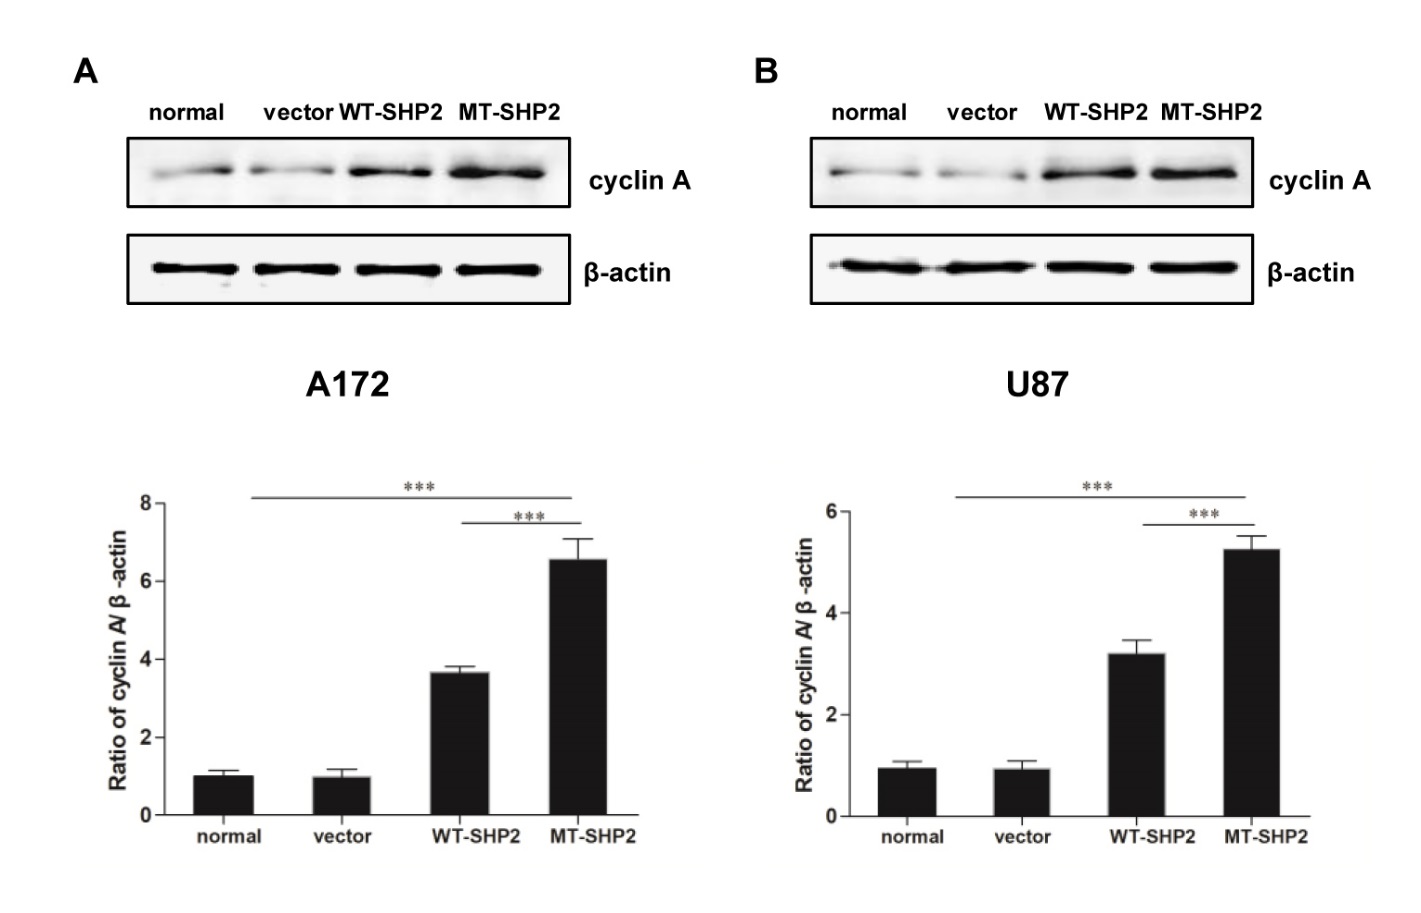

Supplement: Supplementary file 1 [file get_supplementary_file.php]
